# Supplementary material for: IDN2 and Its Paralogs Form a Complex Required for RNA–Directed DNA Methylation
Source: PubMed Central journal article supplement (PMC3342958; doi:10.1371/journal.pgen.1002693), 2012-05-03
Supplement: pgen.1002693.s001.pdf [file pgen.1002693.s001.pdf]

**At3g48670** 1 MGSTVILSSDDESDISESEMDEYGDKMYLNLKGGKLVKRLSPQAFICPYCPNKKKTSFOYKDLLQHASG  
**At3g12550** 1 MN--NKLSD-----FEKNLYKKLKSGLKLVKVSRYRTFLCPYCPDNKKKVGGLYVDILQHASG  
**At4g01780** 1 MGGTRHCYG-----LGYEMFN-----FVWSSSVRFVWSSS----ETLTKIVIIITRSLCI  
**At1g15910** 1 MSIS-DEEAE----ISESEIEDYSETPYRLLRDGT-YKVKVNGQLRCPFCAGKKKQDYKYKELYAHATG  
**At4g00380** 1 MDIS-DEESE----ISESEIEEYSKTPYHLLRSETYYKVKVNGRLRCPFCVCGKKKQDYKYKELHAHATG  
**At1g13790** 1 MYSRRELEDL-----EYRYSEMKGTRKVKI SE SLFRCPFCYIDRKRQYQFDDLLRHASG  
**At1g80790** 1 MDNSSDEESE----ISESEIDVYKPYEKLMMNGD-YKVKVKDTFRCPFCAGKKKQHYKYKELLAHASG  
**At5g59390** 1 -----  
**At4g01180** 1 -----

**At3g48670** 71 VGNSNSDKR-----  
**At3g12550** 55 VGNSQSKKR-----  
**At4g01780** 46 LGKVHT-----  
**At1g15910** 64 VSKGSATR-----  
**At4g00380** 65 VSKGSATR-----  
**At1g13790** 57 IGGSSRTKDGRDKARHLALERYMRKYLPRPRPRPSPSTSDVSSLPKEEFTGKWKSTLSTTEEGEFITEN  
**At1g80790** 65 VAKGSASR-----  
**At5g59390** 1 -----  
**At4g01180** 1 -----

**At3g48670** 79 -----SAKEKASHLALVKYLQODLADSASEAEPSSKRQKN-----  
**At3g12550** 63 -----SLTEKASHRALAKYLIKDLAHYATSTISKRLKARTS-----  
**At4g01780** 51 -----LLTFKVLTFLLKIELQCVFSDCVYVAET-----  
**At1g15910** 71 -----SALQKANHLALAMFLENELAGYAEVPRPPVPPQ-----  
**At4g00380** 72 -----SALQKSNHLALAKFLENLLAGYAEPLPRPPVPPPL-----  
**At1g13790** 127 SSSPHIVKAEPKFSVSGDSDGRSGEERLKFSDKPPDFFSNEDKSYPAKRPCLVSGAKEGDEPVQRIGLSHG  
**At1g80790** 72 -----SAKOKANHFALAKYMENELAGDAD-VPRPQIPSSS-----  
**At5g59390** 1 -----MEKNQKQEFLAETSEMKNTKNNDDCSVQ-----  
**At4g01180** 1 -----MKKKQKQEFVAETSEMNN--NNNECSGQD-----

**At3g48670** 114 -----GNPIQDCDHDEKLVWPWKGI VVNIPTTKAODGRS-AGESGSKLRDEYILRGFNPTVRVRL  
**At3g12550** 99 --FIPAETGDAPIIYDDAQFEKLVWPWKGLVNIPTTSTEDGRSCTGSGPKLKDLELIRRGFNPIRVRTV  
**At4g01780** 79 -----GIVVNIPTTKAODGRP-AGESGSKLRDEYILRGLN-----  
**At1g15910** 106 -----LDETEPNPHNVYVWPWVGIVVNP--LKEADDKELLDSAYWLQ---TLSKFKPEIVNAF  
**At4g00380** 107 -----LDETEPNPHNVYVWPWVGIVVNP--LKETDDKELLDSVYWLQ---TLSKFKPEIVNAF  
**At1g13790** 197 ASFAPTYPQKLVSLGAGNGDQMYVWPWKGLANMKRTFNEKTRKYAGESGSKIREDLTKKGFNPHKVPPL  
**At1g80790** 106 -----TEQSQA VDDIYVWPWVGIVVNP--VRRTDNKNVLLDSAYWLK---KLARFNPLEVKTLL  
**At5g59390** 29 -----QQRFVWPWVGIVVNIPT-TEVEPSGRRVCKSGSTLRDEFMKGFNPTRVQPI  
**At4g01180** 27 -----QQKRYVWPWVGIVVNIPT-TEVEPSGRRVCKSGSTLRDEFMKGFNPTRVKPI

**At3g48670** 174 WN-YLGHSGTAIVEFNKDWNLHNGLLFDKAYTVDGHGKKDWLKKDGPKLG-LYGWLARADDYNGNNIIG  
**At3g12550** 168 WD-RFGHSGTGIVEFNRDWNLQDALVFKKAYEGDGHGKKDWLWCG-ATDSS-LYAWLANADDYRANILG  
**At4g01780** 113 -----NGLLFDKAYRVDGHGKKDWMKKDGPKLG-LYGWLAGADDYVNDVGRG  
**At1g15910** 161 WV-EQDSIVGVIKFNQDWSGFAGATELEKEFEFETQSSKKEWTERS GDSSESKAYGWCARADDFESQGPITG  
**At4g00380** 162 WV-EQDSIVGVIKFNDSWGSFAAATELEKEFEFETQSSKKEWTERS GDSSESKAYGWCARADDFESQGPITG  
**At1g13790** 267 WNGRLGFTGF AIVDFGKEWEGFRNATMFDKHFVVSQCGRDHDLTRDPGD-KLYGWVAKQDDYYSRTAIG  
**At1g80790** 161 WL-DQESVAVIPIQFNQDWSGFKSVTELEKEYEIRCGGRKDWIDKRGDWRSKAYGWCARADDYNSQGSIA  
**At5g59390** 81 WD-FKGHSGFALVEFAKDFEGFESAMNFFERSFNLDHRHGKRDWEKGHRLRDNKLYGWVAREDDYVNRSDTVG  
**At4g01180** 79 WN-TKGHTGFALVEFAKDFKGFESAMQFEKSFDDLDRHGKRDWKKGHLRDRDKLYGWVAREDDYVNRSDTVG

**At3g48670** 242 ENLRKKTGDLKTI AELTEEEARKQELLVQNLRQLVEEKKKDMKEIEELCSVKSEELNQLMEEKKKNQKHY  
**At3g12550** 235 ENLRKMGDLKSIYRFAEEARKDQKLLQRLNFMVENKQYRLKLLQIKYSQDSVKKLYETEKEKILRAYS  
**At4g01780** 160 E-----ESAK-----  
**At1g15910** 230 EYLSKEGQLRTVSDISQKNVQDRNTVLEELSDMIAMTNE DLNKVQYSYNR TAMS LQRVLDEKKNLHQAF A  
**At4g00380** 231 EYLSKEGQLRTVSDILQNNVQDRNTLLDVLNMIAMTNE DLNKVQYSYNR TAMS LQRVLDEKKNLHQAF A  
**At1g13790** 336 DHLRKGQDLKSVSGKEAEDQRKTF TLVSNLENTLVTKSDNLQOMESIYKQTSVLEKRMKEKDEMINTHN  
**At1g80790** 230 EYLSKVKLRSFSDITKEEIQNKSI VVDDLANKIAMTNE DLNKVQYSYNR TAMS LQRVLDEKKNLHQAF A  
**At5g59390** 150 KNVKKRDLKSI SQIVEEDERKMVHLVENMSQTIEKKKQSKQLEQKVDETSRFLFESLELHNVLLNKNIYQ  
**At4g01180** 148 KNVKKRDLKSI SQIVEEDQRKLYHLFENMCQTIEKNKQRKQLEQKVDETSRFLFESLELHNVLLNKNIYQ

At3g48670 312 RELNATQERTMSHIQKIVDDHEKLRKLESERKKLEIKCNELAKREVHNGTFRMKLSEDLQNASKNSSL  
At3g12550 305 EDLTGROOKSTDHFNRI FADHEKQKQVLESQIKLELEIKKLELAKREABNETORKIVAKELEQNAAINSIV  
At4g01780 164 --LNATQERTMRHIQKIVDDHERLTKLLESEKKLEIKGNELAKPQVHNGTFRMKLSEDLQ-----  
At1g15910 300 DETKKMQQMSLRHIQKILYDKEKLSNELDRKMRDLESRAKQLEKHEALTELDKQKLEDEDKRSKSDAMNKSL  
At4g00380 301 EETKKMQQMSLRHIQRILYDKEKLRNLEDRKMRDLESRAKQLEKHEALTELDKQKLEDEDKRSKSDAMNKSL  
At1g13790 406 EKMSIQQTARDYLASIEEBHEKASQHLAQKREYEDRENYLQKCOAKNKTEFRKLDQKHKLNLMATQEQ  
At1g80790 300 QETKKMQELSRKINRI FREQERLTNELEAKMNNLKIWSKQLDKQKQALTELDKQKLEDEDKRSKSDAMNKSL  
At5g59390 220 EGFQKMQMKMEELYQOVLDCHEKSLAELPAKREKLEDERARLIEQRAIINEEEMKSRLEEREMNQKAMCEQ  
At4g01180 215 EEIQKMEKNMQEFYQOVLGGHEKSFALPAKREKLEDERARLIEQRAIKNEEEMKSRLEEREMIQKAMCEQ

At3g48670 382 ELAAMEQKKADEVKLAEDQRROKEELHEKILRLERQDQKQAIELVEQLKQOLNVMKHMMA--SDGDA  
At3g12550 375 QLSALEQKTKREKAQR---LAVDHKEKLEKRIIAALERQLDQKQELVEVQLKQOLNVMKHMMA--LDSGS  
At4g01780 224 -----ROKEELHEKILRLERQIDQVQAIELVEVQLKQOLNVMKHMMA--SDGDA  
At1g15910 370 QLASREQKKADEVLRLVVEEHQROKEDALNKILLLLEKQLDTKQTLMEIQELKQKLVQMKHLG--DDDE  
At4g00380 371 QLASREQKKADEVLRLVVEEHQROKEDALNKILLLLEKQLDTKQTLMEIQELKQKLVQMKHLG--DDDE  
At1g13790 476 NKADEMMRLAEQQQ-----REKDELRKQVRELEKIDAEQALELEIERMRGDLQVMGHMQEGEGEDS  
At1g80790 370 QLASLEQKKTDDRVLRLVDEHKKRKEETLNKILQLEKBLDSKQKLVQMKHLG--DDDE  
At5g59390 290 NEANEEMKLAEKHQ--SSSLKBEKLEKRIEMEMAKLNETQELELEIEKLGKTTNVMKHMVGS DG-DK  
At4g01180 285 NEANEEMKLAEKHQ-----KBEKLEKRIEMEMAKLNETQELELEIEKLGKTTNVMKHMVGS DG-DK

At3g48670 450 EVVKEVDIIFKDLGKBEAQLADLDKFNQTLILRERTNDELQBAHKELVNIMK--EWN---TNIQVGRMG  
At3g12550 440 EIVNKVETFLRDLSETEGDLAHLNQFNQDLVQERKSNDELQBARRALISNLR--DMG---LHIGVGRMG  
At4g01780 271 QVVKEVDIIFKDLVKEAELADLNKFNQTLILRERTNDELQBAHKELVN-----CMG  
At1g15910 438 AVQKMKEMNDELDDKKAELGLESMNSVLMTKERQSNDEIQAAKRLIAGLT--GLLGAETDIGVGRMG  
At4g00380 439 AVQTKMKEMNDELDDKKAELGLESMNSVLMTKERQSNDEIQAAKRLIAGLT--GLLGAESDIGVGRMG  
At1g13790 539 KIKEMLEKTEELKBEEDWEYQESLYQLVVKHGYTNDLQDARKALIRSMR---ELTTRAYIGVGRMG  
At1g80790 437 GIKKMKMKMKEELEKCELEQDLEDTNSALMVKERKSNDEIIVARKFLITELR--ELVSDRNIIRVGRMG  
At5g59390 357 DIVEKLAKTQIQDQET---ALHEKMMTLARKERATNDEYQDVLKEMIQVWNANEELMKQEKIRVGRMG  
At4g01180 347 DIVEKLAKTQIELDARET---ALHEKMMTLARKERATNDEYQDARKEMIKVWKANEELMKQEKIRVGRMG

At3g48670 515 ELVTKPFVDMQOKYCCQ--DVEDRAVEVLQLEWHYLDSDWHPFKRVKLENDREV-----E  
At3g12550 505 ELDTKPFMKAMRIKYCQE--DLEDWAVEVIQLWEYKDPDWHPPFKRIKLETAETIV-----E  
At4g01780 324 ELVVRKPFVDMQOKYCCQE--DVEDRAVEVLQLEWHYINDPDWHPFKRVKLENDREV-----E  
At1g15910 506 ELDEKPFVLDVCKLRYSAN--EAAVEAATLCSTWQENLNKPSWQPFK--HEGTGDGAE-----E  
At4g00380 507 ELDEKPFVLDVCKLRYSAN--EARVEAATLCSTWKENLNKPSWQPFK--REGTGDGAE-----E  
At1g13790 606 ALDETPFKKVAKEKYP--AVEADKAEELCSLWEHLGDSAWHPIKVVVEKDGIAK-----E  
At1g80790 505 ELEEKPFMTACRQRCTVEE-EAQVQYAMLCSKWQEKVKDSAWQPFK--HVTGDRKK-----E  
At5g59390 424 QLNPAFPFLPVMKHKVQTSKAENKAMKLCVWEANIQDVQWTFPRVDES DGTPK-----R  
At4g01180 414 ELNPAFPFLPVMNKH-----KAMMLCSVWAAEIQDVQWTFPRVDES DGTPKQKLHISQHSKCEMQR

At3g48670 571 VDDRDEKLELRLKADLGDGPYNAVTKALEINEYNPSGRYITTELWNFKADKATLEEGVTCLLDQWEKA  
At3g12550 561 VIDEDEKLRITLKNELGDDAYQAVANALEINEYNPSGRYISSELWNFRERDRKATLEEGVNSLLEQWNQA  
At4g01780 380 VDDRDEKLELRLKADLGDGPYNAVTKALEINEYNPSGRYITTELWNFKEDKATLEEGVTCLLDQWEKA  
At1g15910 560 VDEDEDEQLKKLREWGKEVHNAVKTALVEMNEYNASGRYITTELWNFKEGRATLKEVITFISTDIKIL  
At4g00380 561 VDEDEDEQLKKLREWGKEVHNAVKAALVEMNEYNASGRYPTSELWNFKEGRATLKEVITFISTDIKIL  
At1g13790 660 ELNEDEKLELRLKELGEEVYAAVTQALKERNEYNSGRYIVPELWNFKQNRKASIKREGVVYLVNSWKQK  
At1g80790 560 VDEDEDEIKKLRREWGKEVKNVKTALBELNEENPSGRYSVPELWNFKQGRKATLKEVIDYITQVVKTL  
At5g59390 480 VDEDEKLRITLKNQYGEVYNEVVRTKLELEENASGSYVILELWNYEENRKATIBBATDVMLKIRSKL  
At4g01180 475 VDEDEKLRMLKNQYGEVYSEVVRTKLEMEENASGSYETELWNYEENRKATIBBATDVMLKIRSKL

At3g48670 641 KRKRGMMA-----  
At3g12550 631 KHLKS-----  
At4g01780 450 KRKRGMMA-----  
At1g15910 630 KRKRRT-----  
At4g00380 631 KRKRRT-----  
At1g13790 730 KPKPKRR-----  
At1g80790 630 KRRRA-----  
At5g59390 550 AAMKNKRKRLEV  
At4g01180 545 AAMKNKRKRPP--
